# Supplementary material for: Mechanical ventilation settings during weaning from venovenous extracorporeal membrane oxygenation
Source: Research Square preprint supplement (doi:10.21203/rs.3.rs-3990147/v1), 2024-03-11
Supplement: Supplementary file 2 [file 5e22ebc3c6c7d89fc0151375.docx]

**Supplementary Information**

**Mechanical ventilation settings during weaning from venovenous extracorporeal membrane oxygenation**

Maria Teresa Passarelli 1,2, Matthieu Petit 3, Roberta Garberi 1,2 , Guillaume Lebreton 3,4, Charles Edouard Luyt 3,5, Marc Pineton De Chambrun 3 , Juliette Chommeloux 3 , Guillaume Hékimian 3 , Emanuele Rezoagli 1,2 , Giuseppe Foti 1,2, Alain Combes 3,5,

Marco Giani # 1,2 , Matthieu Schmidt # 3,5

**Corresponding author :**

Matthieu Schmidt MD, PhD, Service de Médecine Intensive Réanimation, iCAN, Institute of Cardiometabolism and Nutrition, Hôpital de la Pitié-Salpêtrière, 47 Boulevard de l’Hôpital, 75651 Paris CEDEX 13, France (matthieu.schmidt@aphp.fr).

**Table s1 Prerequisites for weaning trial, weaning trial protocol, and criteria for successful trial according to the two groups**

|  | **Controlled Ventilation** | **Spontaneous Breathing** |
| --- | --- | --- |
| **Prerequisites for ECMO weaning trial** | - (Full) sedation +/- NMBA - TV 6mL/kg IBW; RR ≤ 28/min; PEEP 6-14 cmH2O; FiO2 ≤60%   *With resulting :*   - Pplat ≤ 28 cmH2O or - Pplat ≤ 34 cmH2O if BMI >34 kg/m2 | - RR ≤ 25/min; PEEP 6-14 cmH2O; FiO2 ≤50% - Compliance RS >0.4 ml/cmH2O/kg of IBW   *With resulting :*   - Driving pressure ≤ 14cmH2O |
| **ECMO Weaning trial** | - Turn off the sweep gas flow - Maintain ECMO flow >3L/min   *If:*   - SpO2 ≥90% with FiO2 ≤60%   *Then perform :*   - Blood gas at H1, H3, and H6 | - Turn off the sweep gas flow - Maintain ECMO flow >3L/min   *If :*   - SpO2 ≥90% with FiO2 ≤50% - RR ≤ 25/min - Driving pressure <15cmH2O   *Then perform :*  Blood gas at H1, H3 |
| **Criteria for ECMO withdrawing)** | *Withdraw ECMO if after a 24-hour weaning trial:*   - PaO2 ≥ 60 mmHg, SaO2 ≥ 90%, with FiO2 ≤ 60% - PCO2 ≤ 50 mmHg or pH ≥7.36, with RR ≤ 28/min - Pplat ≤ 28 cmH2O *or* ≤ 34 cmH2O if BMI >34 kg/m2 - Driving pressure ≤ 14cmH2O - and if no signs of acute cor pulmonale | *Withdraw ECMO if after a 6-12-hour weaning trial:*   - pH ≥7.35, with RR ≤ 25/min - Compliance RS >0.4 ml/cmH2O/kg of IBW - Driving pressure ≤ 14cmH2O |

*NMBA* neuromuscular blocking agents*, TV* tidal volume*, IBW* ideal body weight*, PEEP* positive end-expiratorypressure*, Pplat* plateau pressure*, BMI,* body mass index*, RR* respiratory rate*.*

**Table s2 Association of covariates with the 90-day adjusted probability of successful weaning from mechanical ventilation after ECMO decannulation in the multivariable model stratified on COVID-19, expressed using sHR with their 95% CI**

|  | **Subdistribution hazard ratio.**  **(95% CI)** | ***P* value** |
| --- | --- | --- |
| Age, per 10 years | 0.78 (0.69 – 0.88) | <0.001 |
| Body mass index, per 10 kg/m2 | 0.88 (0.74 – 1.04) | 0.140 |
| Pre-ECMO PaO2/FiO2, per 10mmHg | 0.94 (0.87 – 1.02) | 0.141 |
| Pre-ECMO SOFA | 0.96 (0.93 – 1.00) | 0.047 |
| Renal replacement therapy | 0.78 (0.59 – 1.03) | 0.087 |
| Prone positioning during ECMO | 0.75 (0.54 – 1.04) | 0.089 |
| Pneumothorax | 0.50 (0.29 – 0.85) | 0.012 |
| Ventilator associated pneumonia during ECMO | 0.69 (0.49 – 0.98) | 0.038 |
| ECMO duration, per 10 days | 0.96 (0.89 – 1.02) | 0.400 |
| ECMO weaning compliance, per 10mL/cmH2O | 1.09 (0.98 – 1.22) | 0.095 |
| Spontaneous breathing | 1.20 (0.81 – 1.78) | 0.360 |

*ECMO* extracorporeal membrane oxygenation*, SOFA* Sequential Organ Failure Assessment, *sHR,* subdistribution hazard ratio
